# Supplementary material for: Antibodies against cyclic citrullinated peptides of IgG, IgA and IgM isotype and rheumatoid factor of IgM and IgA isotype are increased in unaffected members of multicase rheumatoid arthritis families from northern Sweden
Source: PubMed Central journal article supplement — Ann Rheum Dis. 2011 Nov 29;71(6):825–9. doi: 10.1136/annrheumdis-2011-200668 (PMC3371219; doi:10.1136/annrheumdis-2011-200668), 2011-11-29
Supplement: ard-71-6-0825-s1.pdf [file ard-71-6-0825-s1.pdf]

Figure 3a.  
CCPIgM

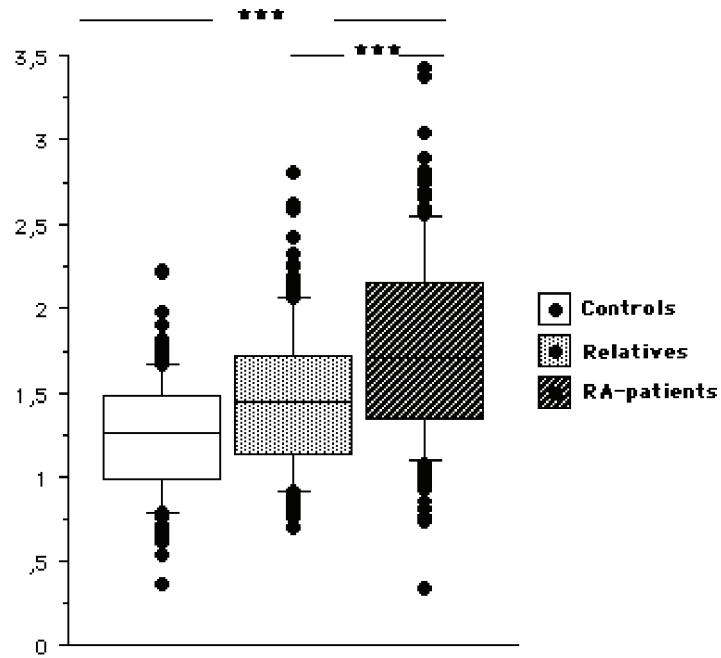

Figure 3b.  
CCPIgA

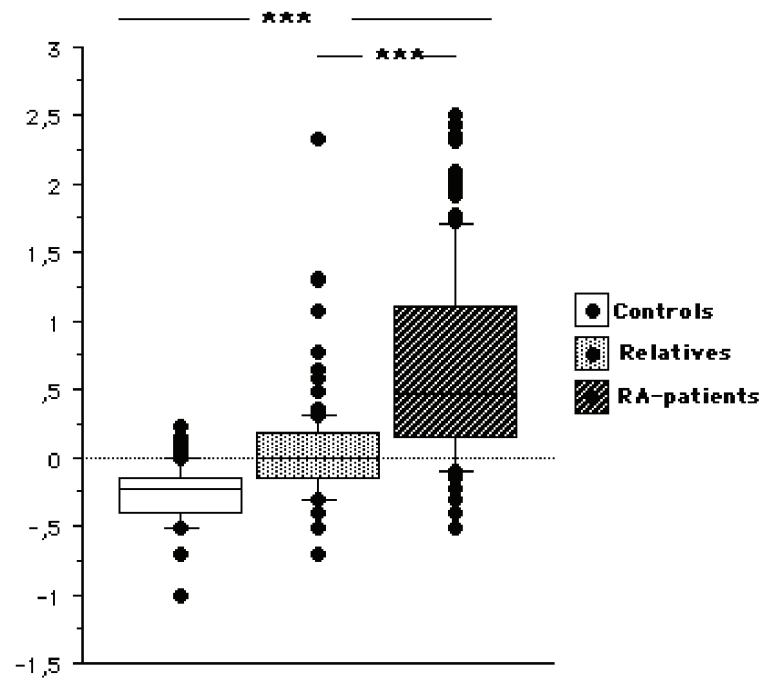

Figure 3c  
CCPIgG

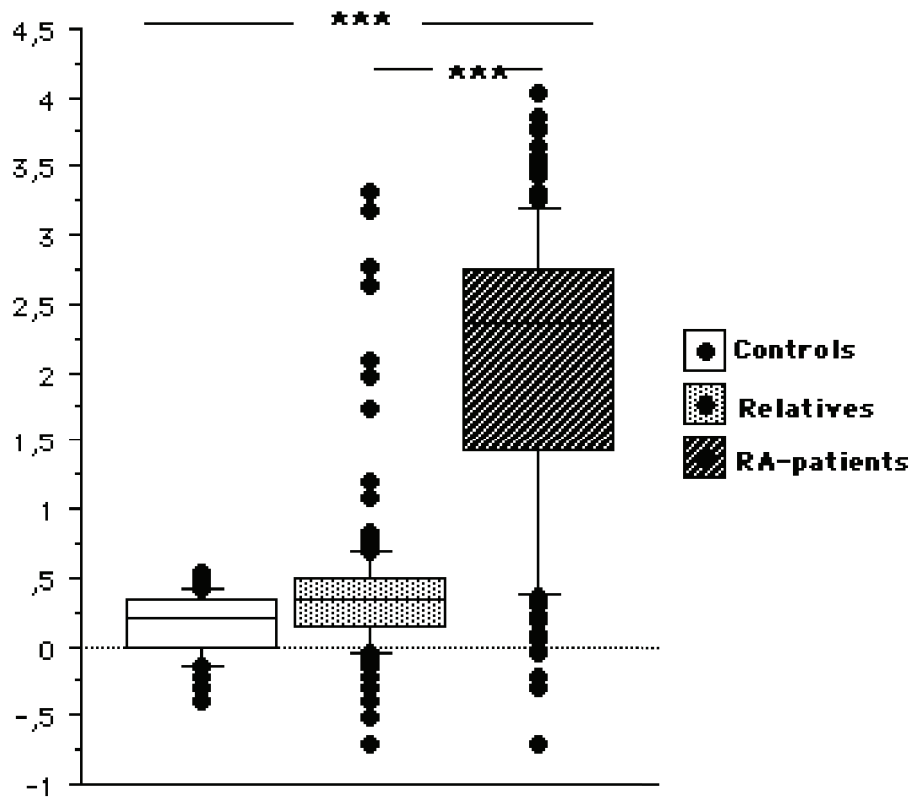

Figure legends to supplementary figure 3a-c.

Concentrations (in logarithmic scale) of anti-CCP isotypes in healthy controls, first degree relatives and patients with RA.

\*\*\*  $p < 0.001$

- a) anti-CCP IgM isotype
- b) anti-CCP IgA isotype
- c) anti-CCP IgG isotype
